# Supplementary material for: Optimization, Characterization and Pharmacokinetic Study of Meso-Tetraphenylporphyrin Metal Complex-Loaded PLGA Nanoparticles
Source: MDPI journal article supplement (doi:10.3390/ijms222212261), 2021-11-12
Supplement: s1 [file s1]

## SUPPLEMENTARY MATERIALS

### Optimization, characterization and pharmacokinetic study of meso-tetraphenylporphyrin metal complexes loaded PLGA nanoparticles

Mariia R. Mollaeva <sup>1,2,\*</sup>, Nikita Yabbarov <sup>1,2</sup>, Maria Sokol <sup>1,2</sup>, Margarita Chirkina <sup>1,2</sup>, Murad D. Mollaev <sup>2,3</sup>, Artur Zabolotskii <sup>2,4</sup>, Irina Seregina <sup>4</sup>, Mikhail Bolshov <sup>4</sup>, Alexander Kaplun <sup>5</sup> and Elena Nikolskaya <sup>1,2,\*</sup>

#### S1.1. Optimization of Process Parameters for CoTPP-loaded NPs Preparation

As a result of 17 experiments, nanoparticles with CoTPP loading content from 0.4% to 10.9% and average diameters ~ 203-714 nm were obtained (Table S1).

**Table S1.** Variation factors of the CoTPP-loaded nanoparticles formulation process and response functions.

| №  | Independent variable |                |                | Dependent variable |                |
|----|----------------------|----------------|----------------|--------------------|----------------|
|    | X <sub>1</sub>       | X <sub>2</sub> | X <sub>3</sub> | Y <sub>1</sub>     | Y <sub>2</sub> |
| 1  | 0                    | 0              | 0              | 2.4±0.2            | 589.5±18.2     |
| 2  | 0                    | 0              | 0              | 2.2±0.8            | 606.0±15.6     |
| 3  | 1                    | 1              | 0              | 0.9±0.6            | 396.6±7.6      |
| 4  | 1                    | -1             | 0              | 1.3±0.8            | 319.2±4.1      |
| 5  | -1                   | 0              | 1              | 8.1±0.6            | 572.0±12.0     |
| 6  | -1                   | -1             | 0              | 6.3±0.2            | 442.4±10.1     |
| 7  | 0                    | 1              | -1             | 0.4±0.1            | 206.1±1.3      |
| 8  | -1                   | 1              | 0              | 10.9±0.7           | 671.6±16.4     |
| 9  | 0                    | 0              | 0              | 2.5±0.3            | 597.0±19.6     |
| 10 | 1                    | 0              | -1             | 2.1±0.5            | 685.9±14.1     |
| 11 | 0                    | 1              | 1              | 2.2±0.1            | 203.4±2.0      |
| 12 | 0                    | 0              | 0              | 2.4±0.2            | 587.1±17.8     |
| 13 | 0                    | -1             | 1              | 1.6±0.8            | 251.9±2.0      |
| 14 | -1                   | 0              | -1             | 1.3±0.1            | 544.3±15.6     |
| 15 | 0                    | -1             | -1             | 2.5±0.6            | 241.4±1.2      |
| 16 | 1                    | 0              | 1              | 0.9±0.6            | 714.3±14.9     |
| 17 | 0                    | 0              | 0              | 2.4±0.3            | 595.7±16.9     |

The adequacy of mathematical model was expressed by the determination coefficient R<sup>2</sup>. The statistical significance was tested using Fisher's F-test (Table S2).

**Table S2.** Regression analysis and ANOVA for the CoTPP response surface models.

| Models                                             | R-Squared | Adjusted R-Squared | F-Value | p-value Prob > F |
|----------------------------------------------------|-----------|--------------------|---------|------------------|
| Response Y <sub>1</sub> (CoTPP loading content, %) |           |                    |         |                  |
| Linear                                             | 0.5065    | 0.3927             | 491.16  | <0.0001          |
| 2FI                                                | 0.6924    | 0.5079             | 458.97  | <0.0001          |
| Quadratic                                          | 0.8725    | 0.7086             | 379.65  | <0.0001          |
| Response Y <sub>2</sub> (particle size, nm)        |           |                    |         |                  |
| Linear                                             | 0.0165    | -0.2105            | 1018.37 | <0.0001          |
| 2FI                                                | 0.0279    | -0.5554            | 1509.78 | <0.0001          |
| Quadratic                                          | 0.8468    | 0.6499             | 474.68  | <0.0001          |

The analysis of variance in ANOVA has shown that the quadratic model is reliable and accurate regarding pure error. It can also be noted (data not shown) that the input parameters  $X_1$ ,  $X_1^2$  in the analysis of total content and  $X_2$ ,  $X_2^2$  in the analysis of particle size turned out to be the most significant.

Further, according to the results of analysis, regression equations were formulated. Based on the calculated coefficients, nonlinear quadratic equations (equation S1, S2) were obtained, making it possible to predict the shape of the response surface:

$$Y_1 = 2.37 - 2.69X_1 + 0.33X_2 + 0.8X_3 - 1.21X_1X_2 - 1.98X_1X_3 + 0.67X_2X_3 + 1.95X_{12} + 0.53X_{22} - 1.22X_{32} \text{ (S1)}$$

$$Y_2 = 594.96 - 14.29X_1 + 27.85X_2 + 7.99X_3 - 37.95X_1X_2 + 0.17X_1X_3 - 3.30X_2X_3 + 132.96X_{12} - 270.47X_{22} - 98.79X_{32} \text{ (S2)}$$

Based on quadratic equation (equation S1), it can be noted that PVA and the organic/aqueous (O/W) ratio are positively significant factors, while PLGA is negatively significant. Moreover, PVA and the O/W ratio interact positively, in contrast to PLGA, showing a negative interaction with PVA and the O/W ratio. Figure S1 (A,B) shows a strong effect of PLGA on the CoTPP loading content, while variation of PVA and the O/W ratio does not reveal any significant changes. It is known that the polymer weight influences the loading content of a substance and the average size of nanoparticles. Probably, due to a low PLGA mass in solution, the organic solvent diffuses faster into the aqueous phase to form nanoparticles [48,49].

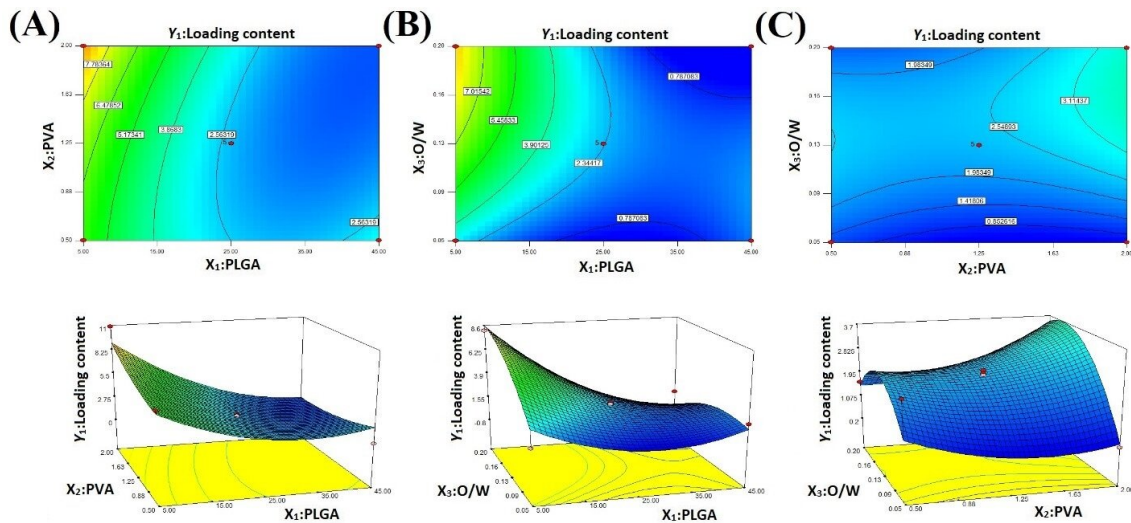

**Figure S1.** Two- and three-dimensional diagrams of the CoTPP loading content response surface depending on PLGA (A), PVA (B) and O/W ratio (C).

The quadratic equation for particle size response (equation S2), like the previous one, shows that PLGA is a negatively significant factor. However, the interaction PVA-PLGA and PVA-O/W ratio is negatively significant: neither the PLGA mass nor the O/W ratio possesses a significant effect on the particle size (Figure S2). However, with a decrease in the PVA concentration (to 0.5%), the particle size can reach ~ 180 nm. A low concentration of PVA reduces the viscosity of the aqueous phase and facilitates the diffusion of the organic solvent, leading to the formation of particles with a smaller size [51].

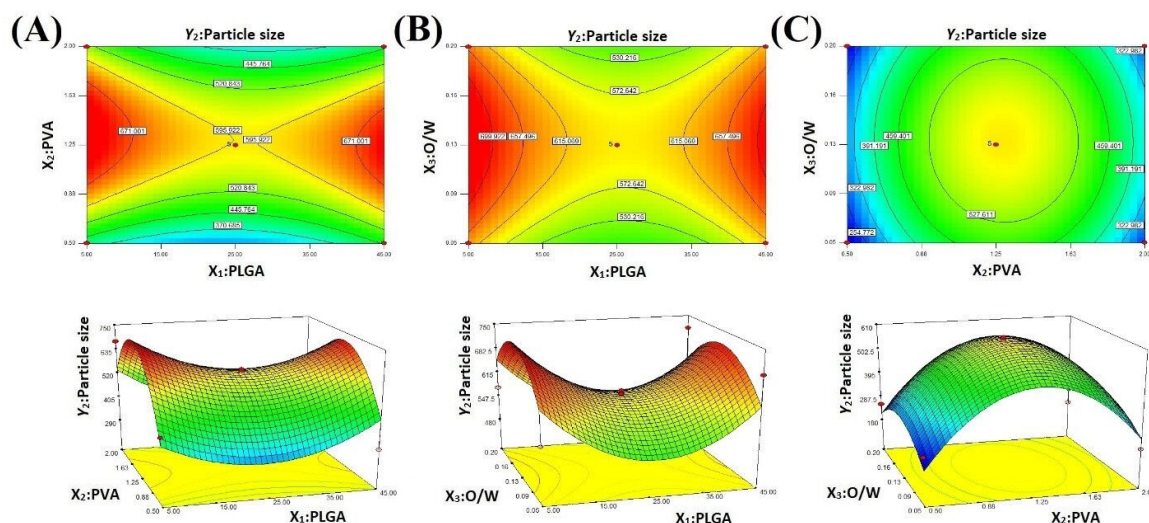

**Figure S2.** Two- and three-dimensional diagrams of the particle size response surface depending on PLGA (A), PVA (B) and O/W ratio (C).

Based on the specified characteristics, such as the minimized particle size and maximized CoTPP loading content, 22 options for optimizing nanoparticles were obtained. Among all the results, the factors values with the highest desirability (0.750) were selected and the best parameters were 7.22 mg of PLGA, 2% PVA and the O/W ratio = 1:5. The predicted value for CoTPP loading content is 10.3%, while that for the particle size – is 409.6 nm. Along with LC and PS, optimized NPs were analyzed for EE, zeta potential and PDI (Table 4).

### S1.2. Optimization of Process Parameters for MnClTPP-loaded NPs Preparation

In order to optimize MnClTPP-loaded particles by Box-Behnken method, 17 experiments were carried out. The resulting particles possessed a MnClTPP total content from 3.4% to 17.0% and particle sizes 247.0 – 485.0 nm (Table S3).

**Table S3.** Variation factors of the MnClTPP-loaded nanoparticles formulation process and response functions

| №  | Independent variable |                |                | Dependent variable |                |
|----|----------------------|----------------|----------------|--------------------|----------------|
|    | X <sub>1</sub>       | X <sub>2</sub> | X <sub>3</sub> | Y <sub>1</sub>     | Y <sub>2</sub> |
| 1  | 0                    | 0              | 0              | 10.1±0.5           | 257.3±3.9      |
| 2  | 0                    | 0              | 0              | 10.2±0.6           | 249.5±3.7      |
| 3  | 1                    | 1              | 0              | 5.7±0.2            | 287.0±1.9      |
| 4  | 1                    | -1             | 0              | 7.8±0.4            | 269.7±2.3      |
| 5  | -1                   | 0              | 1              | 7.7±0.7            | 324.5±5.3      |
| 6  | -1                   | -1             | 0              | 17.0±0.8           | 288.5±6.9      |
| 7  | 0                    | 1              | -1             | 3.4±0.3            | 381.3±6.6      |
| 8  | -1                   | 1              | 0              | 12.5±0.2           | 260.4±3.1      |
| 9  | 0                    | 0              | 0              | 10.3±0.6           | 259.8±3.4      |
| 10 | 1                    | 0              | -1             | 7.4±0.9            | 357.5±5.3      |
| 11 | 0                    | 1              | 1              | 10.3±0.4           | 303.5±4.8      |
| 12 | 0                    | 0              | 0              | 10.2±0.5           | 247.4±2.5      |

|    |    |    |    |          |           |
|----|----|----|----|----------|-----------|
| 13 | 0  | -1 | 1  | 15.8±0.5 | 477.4±6.4 |
| 14 | -1 | 0  | -1 | 7.7±0.4  | 324.5±3.5 |
| 15 | 0  | -1 | -1 | 14.6±0.2 | 484.3±8.5 |
| 16 | 1  | 0  | 1  | 8.6±0.6  | 256.2±7.6 |
| 17 | 0  | 0  | 0  | 10.1±0.4 | 255.6±0.9 |

Using the determination coefficient  $R^2$ , there was a confirmation of the mathematical model adequacy. The statistical significance was tested using Fisher's F-test (Table S4).

**Table S4.** Regression analysis and ANOVA for the MnCITPP response surface models.

| Models                                               | R-Squared | Adjusted R-Squared | F-Value | p-value Prob > F |
|------------------------------------------------------|-----------|--------------------|---------|------------------|
| Response Y <sub>1</sub> (MnCITPP loading content, %) |           |                    |         |                  |
| Linear                                               | 0.6454    | 0.5636             | 1848.64 | <0.0001          |
| 2FI                                                  | 0.8639    | 0.7822             | 1063.97 | <0.0001          |
| Quadratic                                            | 0.9142    | 0.8038             | 1341.31 | <0.0001          |
| Response Y <sub>2</sub> (particle size, nm)          |           |                    |         |                  |
| Linear                                               | 0.1800    | -0.0092            | 295.54  | <0.0001          |
| 2FI                                                  | 0.2136    | -0.2582            | 425.13  | <0.0001          |
| Quadratic                                            | 0.8972    | 0.7649             | 110.03  | 0.0003           |

Taking into account the ANOVA results, it can be concluded that the 2FI model is reliable for the MnCITPP loading content, while the quadratic model is reliable and accurate regarding pure error in the case of the particle size. The most significant parameters in the analysis of the MnCITPP loading content were the input parameters  $X_1$  and  $X_3$  (data not shown) and parameters  $X_2$ ,  $X_2^2$  in the case of particle size analysis.

The linear model for the MnCITPP loading content and the quadratic model for the particle size were expressed by equations S3 and S4 as given below:

$$Y_1 = 9.31 + 0.16X_1 - 8.10X_2 + 113.04X_3 + 0.04X_1X_2 - 3.65X_1X_3 + 25.78X_2X_3 \text{ (S3)}$$

$$Y_2 = 670.78 + 5.62X_1 - 307.66X_2 - 3879.86X_3 + 0.76X_1X_2 - 11.78X_1X_3 - 315.11X_2X_3 - 0.10X_1^2 + 112.07X_2^2 + 16829.33X_3^2 \text{ (S4)}$$

The polynomial regression equation (equation S3) indicated that  $X_2$  has a negative effect on the loading content, while  $X_1$  and  $X_3$  were favorable factors. Perhaps a positive effect of these factors is associated with the complexity of MnCITPP release from a polymer matrix with a high viscosity. A decrease in the aqueous phase contributes to a slow diffusion of chloroform into water, hence a greater amount of MnCITPP remains inside the nanoparticles [48].

Moreover, Figure S3 (A,C) demonstrated a strong effect of  $X_2$  on MnCITPP loading content, while variation of  $X_1$  and  $X_3$  did not reveal any significant changes. A low PVA concentration may contribute to a high MnCITPP loading content due to a decrease in the surface tension of the primary emulsion [49].

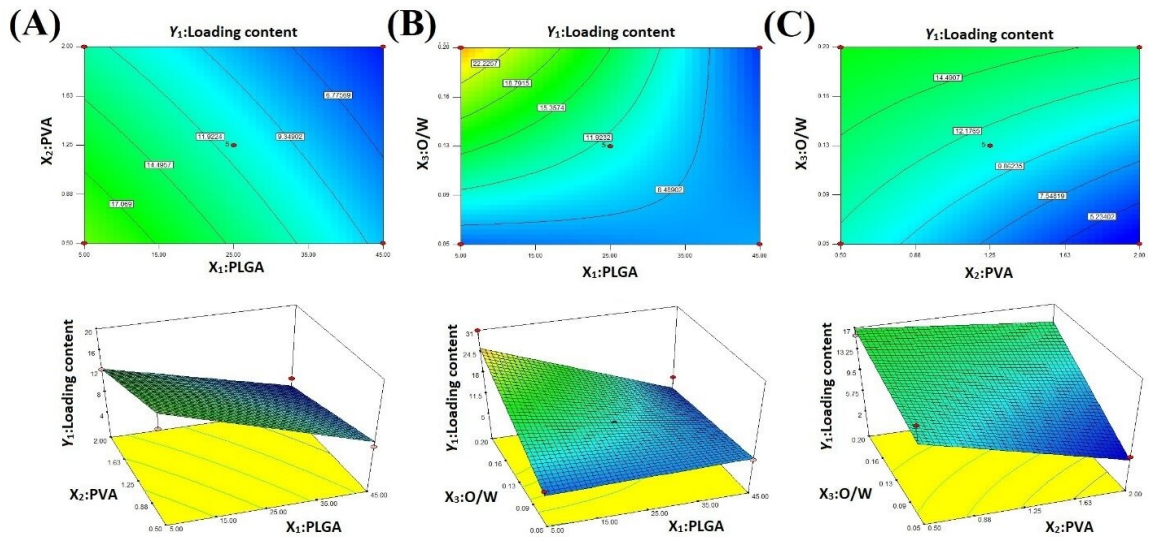

**Figure S3.** Two- and three-dimensional diagrams of the MnCITPP loading content response surface depending on PLGA (A), PVA (B) and O/W ratio (C).

As can be seen in the particle size response quadratic equation (equation S4),  $X_1$  is a negatively significant factor which indicated that an increase in the PLGA mass decreases the particle size. However, as shown in Figure S4,  $X_1$  did not possess a significant effect on the particle size. Meanwhile, the interaction of  $X_3$  with  $X_1$  and  $X_2$  is negatively significant. Figure S4 (C) clearly demonstrates a “canopy type” of the response surface, indicating an initial nonlinear decrease accompanied by an increase in the MnCITPP-loaded particle size. Perhaps, a positive interaction between  $X_2$  and  $X_3$  factors affects the viscosity of the solution: a viscosity decrease induced by a decrease in the PVA concentration or an increase in the volume of the water phase may lead to a loss of particle stabilization and aggregation [52].

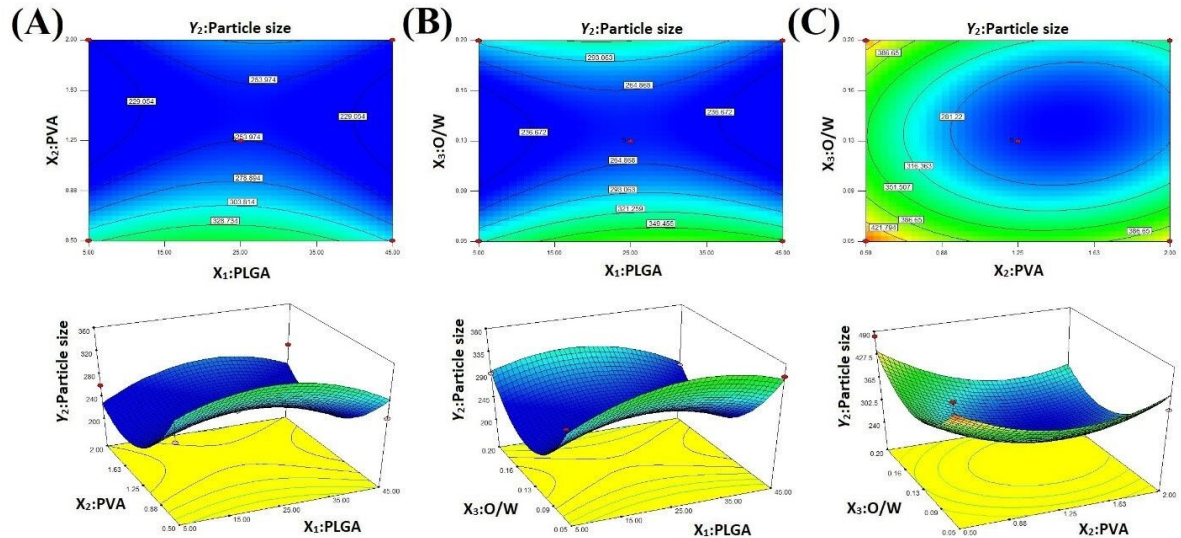

**Figure S4.** Two- and three-dimensional diagrams of the particle size response surface depending on PLGA (A), PVA (B) and O/W ratio (C).

Thus, we received 13 solutions for optimizing NPs using the Box-Behnken experimental design. To obtain NPs with a minimized particle size and a maximized MnCITPP loading content, the factors values with the highest desirability (0.837) were selected: 5 mg of PLGA, 1.42% PVA

and the O/W ratio = 1:5.56. The predicted value for the MnClTPP loading content is 22.6%, while for the particle size 247.4 nm. Along with LC and PS, optimized NPs were analyzed for EE, zeta potential and PDI (Table 4).

#### S2.1. *In Vitro* Cytotoxicity of the ascorbic acid

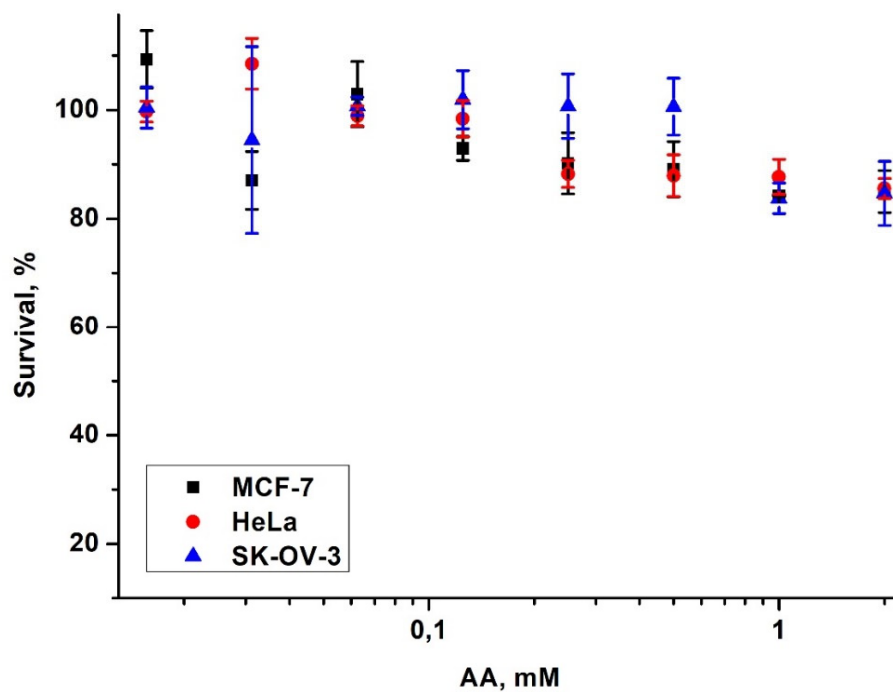

**Figure S5.** Cytotoxic activity of the ascorbic acid (AA) against MCF7, HeLa and SK-OV-3 cells after 72 h of incubation.
